# Supplementary material
Source: publisher figshare collection journal article supplement (https://diabetesjournals.figshare.com/ndownloader/files/24028649)
Supplement: Supplementary file 1 [file 24028649]

Supplement Figure 1

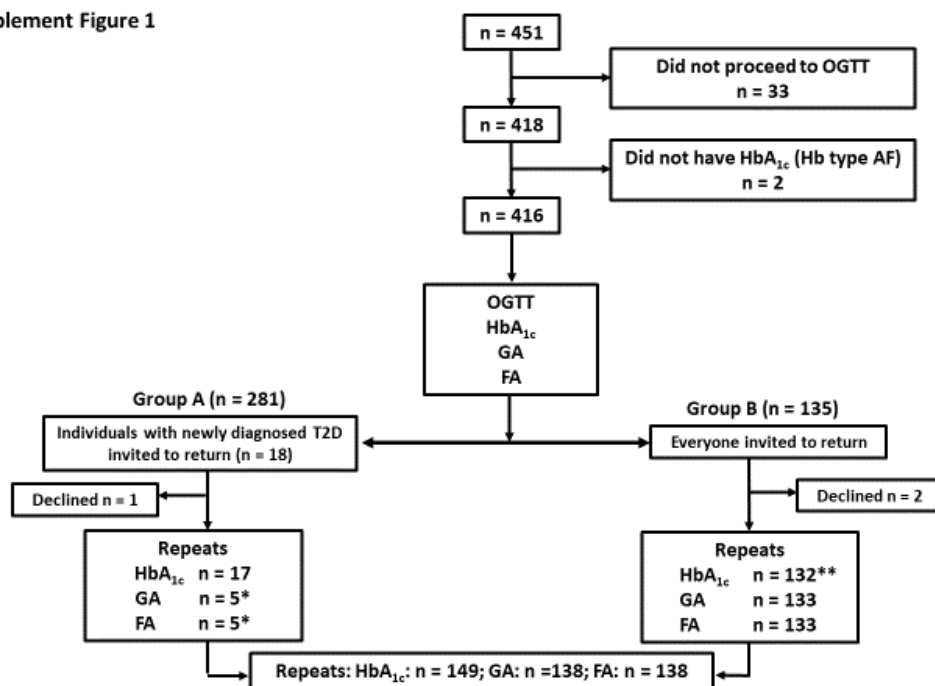

Supplement Figure 1. Flow diagram for enrollment in overall investigation and duplicate sub-study. Group A: only individuals who met glucose criteria for T2D were invited to return. Group B: independent of glucose tolerance category all participants invited to return. \*GA and fructosamine (FA) were obtained in the last 5 consecutively enrolled individuals who met criteria for T2D. \*\*One whole blood sample for HbA<sub>1c</sub> clotted.

**Supplement Table 1: Participant Characteristics by African Region of Origin**

| Parameter <sup>1</sup>            | Total<br>100% (n=416) | West<br>53% (n=220) | Central<br>18% (n=74) | East<br>29% (n=122) | P-value <sup>2</sup> |
|-----------------------------------|-----------------------|---------------------|-----------------------|---------------------|----------------------|
| Sex (% Men)                       | 66% (276/303)         | 66%(146/220)        | 73% (54/74)           | 62% (76/122)        | 0.308                |
| Age (y)                           | 39±10                 | 39±11               | 39±11                 | 38±9                | 0.627                |
| Age at entry to United States (y) | 26±11                 | 25±11               | 29±9                  | 27±11               | 0.069                |
| Years in the United States (y)    | 12±10                 | 14±11               | 10±9                  | 11±9                | 0.009, a*            |
| Hemoglobin (g/dL)                 | 14.0±1.4              | 14.0±1.4            | 14.0±1.3              | 14.1±1.5            | 0.540                |
| Hematocrit (%)                    | 41.9±3.9              | 41.8±4.2            | 41.6±3.6              | 42.2±3.7            | 0.588                |
| Sickle Cell Trait                 | 15% (61/416)          | 17%(37/220)         | 19%(14/74)            | 8%(10/122)          | 0.002                |
| Hemoglobin C Trait                | 3% (13/416)           | 6%(13/220)          | 0%(0/74)              | 0%(0/122)           | 0.002                |
| BMI (kg/m <sup>2</sup> )          | 27.7±4.5              | 27.8±4.5            | 28.1±5.0              | 27.0±4.1            | 0.166                |
| Waist Circumference (cm) (n=415)  | 91±12                 | 91±12               | 90±11                 | 91±11               | 0.812                |
| VAT (cm <sup>3</sup> ) (n=406)    | 99±69                 | 93±65               | 106±76                | 106±72              | 0.154                |
| Abnormal Glucose Tolerance (%)    | 37% (152/416)         | 33%(73/220)         | 43%(32/74)            | 39%(47/122)         | 0.258                |
| Prediabetes                       | 30% (124/416)         | 27%(59/220)         | 36%(27/74)            | 31%(38/122)         | 0.566                |
| Diabetes                          | 7% (28/416)           | 6%(14/220)          | 7%(5/74)              | 7%(9/122)           | 0.566                |
| Fasting glucose (mmol/L)          | 5.1±0.8               | 5.1±0.9             | 5.1±0.5               | 5.2±0.5             | 0.903                |
| Glucose @ 2 hours (mmol/L)        | 7.3±2.4               | 7.3±2.6             | 7.5±1.8               | 7.3±2.3             | 0.724                |
| AUC-Glucose (n=414)               | 544±128               | 537±139             | 560±99                | 546±123             | 0.428                |
| Insulin Sensitivity Index (n=412) | 5.43±3.64             | 5.45±3.57           | 5.62±4.62             | 5.29±3.10           | 0.827                |
| Insulin Secretion (n=412)         | 0.54±0.36             | 0.57±0.37           | 0.55±0.44             | 0.49±0.26           | 0.162                |

<sup>1</sup> Data presented as mean±SD or percentages

<sup>2</sup> Comparison by One-Way ANOVA with Bonferroni corrections or Chi-square as appropriate

Comparison between a: West vs. Central; b: West vs. East; c: Central vs. East

\*P-value ≤ 0.05; \*\*P-value ≤ 0.01; \*\*\*P-value ≤ 0.001

**Supplement Table 2: Diagnosis of Abnl-GT in the Nonobese and the Obese**

| Parameter                     | Sensitivity (95% CI) | Specificity (95% CI) | P-value <sup>1</sup> |
|-------------------------------|----------------------|----------------------|----------------------|
| <b>Nonobese (n=303)</b>       |                      |                      |                      |
| HbA <sub>1c</sub> ≥ 39 mmol/L | 36% (27%, 45%)       | 80% (74%, 85%)       | Reference            |
| GA ≥ 14.2%                    | 37% (28%, 46%)       | 75% (69%, 81%)       | 0.529                |
| HbA <sub>1c</sub> + GA        | 58% (48%, 67%)       | 60% (53%, 66%)       | <0.001               |
| <b>Obese (n=113)</b>          |                      |                      |                      |
| HbA <sub>1c</sub> ≥ 39 mmol/L | 60% (46%, 73%)       | 80% (68%, 88%)       | Reference            |
| GA ≥ 14.2%                    | 27% (16%, 42%)       | 94% (85%, 98%)       | <0.001               |
| HbA <sub>1c</sub> + GA        | 67% (52%, 79%)       | 74% (62%, 83%)       | 0.250                |
| <b>Whole Cohort (n=416)</b>   |                      |                      |                      |
| HbA <sub>1c</sub> ≥ 39 mmol/L | 43% (36%, 51%)       | 80% (75%, 85%)       | Reference            |
| GA ≥ 14.2%                    | 34% (26%, 42%)       | 80% (75%, 84%)       | 0.086                |
| HbA <sub>1c</sub> + GA        | 61% (53%, 68%)       | 63% (57%, 69%)       | <0.001               |

<sup>1</sup> Comparison by McNemar test to the Reference Group (HbA<sub>1c</sub>)

**Supplement Table 3: Abnl-GT Detected by HbA<sub>1c</sub> versus by GA-alone (n=92)**

| Characteristic <sup>a</sup> | Detected by HbA <sub>1c</sub> <sup>b</sup> (n=66) | Detected by GA-alone (n=26) | P-value <sup>b</sup> |
|-----------------------------|---------------------------------------------------|-----------------------------|----------------------|
| Age (y)                     | 47±10                                             | 41±9                        | 0.015                |
| BMI (kg/m <sup>2</sup> )    | 30.4±4.7                                          | 26.8±2.4                    | <0.001               |
| Waist Circumference (cm)    | 99±12                                             | 91±8                        | 0.001                |
| VAT (cm <sup>3</sup> )      | 154±74                                            | 113±66                      | 0.015                |
| Fasting Glucose (g/dL)      | 59±1.4                                            | 5.4±0.6                     | 0.143                |
| 2h Glucose (g/dL)           | 10.0±3.4                                          | 9.3±2.3                     | 0.361                |
| Matsuda Index               | 2.92±2.05                                         | 3.22±1.73                   | 0.507                |
| Insulinogenic Index         | 0.426±0.230                                       | 0.418±0.264                 | 0.876                |
| Oral Disposition Index      | 1.01±0.50                                         | 1.01±0.37                   | 0.389                |
| Variant Hb <sup>f</sup>     | 24% (16/66)                                       | 27% (7/26)                  | 0.789                |
| Albumin g/L                 | 40±28                                             | 40±25                       | 0.367                |

<sup>a</sup>Data presented as mean±SD

<sup>b</sup>Comparisons were by unpaired t-tests

<sup>c</sup>HbS or HbC trait (18 with SCT and 5 with AC)

**Supplement Table 4: Net Reclassification Index for Adding GA to the HbA<sub>1c</sub> for the Prediction of Abnormal Glucose Tolerance**

| Variable               | Net Reclassification Index (NRI) | 95% CI       | P-value |
|------------------------|----------------------------------|--------------|---------|
| <b>Nonobese</b>        |                                  |              |         |
| HbA <sub>1c</sub>      | Reference                        |              |         |
| GA                     | ---                              |              |         |
| HbA <sub>1c</sub> + GA | 0.238                            | 0.018, 0.459 | 0.034   |
| <b>Obese</b>           |                                  |              |         |
| HbA <sub>1c</sub>      | Reference                        |              |         |
| GA                     | ---                              |              |         |
| HbA <sub>1c</sub> + GA | 0.419                            | 0.141, 0.696 | 0.003   |
| <b>Total Cohort</b>    |                                  |              |         |
| HbA <sub>1c</sub>      | Reference                        |              |         |
| GA                     | ---                              |              |         |
| HbA <sub>1c</sub> + GA | 0.270                            | 0.091, 0.448 | 0.003   |
